# Supplementary material for: Instability of two-dimensional hybrid perovskites underpinned by organic molecule loss under light illumination
Source: Royal Society of Chemistry journal article supplement (doi:10.1039/d4qm00324a), 2024-01-01
Supplement: d4qm00324a1.pdf [file d4qm00324a1.pdf]

## Supporting Information

### **Instability of Two-dimensional Hybrid Perovskites Underpinned by Organic Molecule Loss under Light Illumination**

*Cenchen Zhong, Xiangli Che\*, Chao Xu, Changsheng Chen, Chen Yang, and Ye Zhu\**

Department of Applied Physics, Research Institute for Smart Energy, The Hong Kong Polytechnic University, Hong Kong 999077, China

E-mail: [xiangli.che@polyu.edu.hk](mailto:xiangli.che@polyu.edu.hk), [yezhu@polyu.edu.hk](mailto:yezhu@polyu.edu.hk)

## Table of Contents

**Figure S1.** Structural model of 2D perovskite  $(\text{BA})_2(\text{MA})_{n-1}\text{Pb}_n\text{Br}_{3n+1}$  with  $n = 1, 2,$  and  $3$ .

**Figure S2.** UV-vis spectra of 2D perovskite  $(\text{BA})_2(\text{MA})_{n-1}\text{Pb}_n\text{Br}_{3n+1}$  with  $n = 1, 2,$  and  $3$ .

**Figure S3.** Experimental and calculated XRD patterns for 2D perovskite  $(\text{BA})_2(\text{MA})_{n-1}\text{Pb}_n\text{Br}_{3n+1}$  with  $n = 1^1, 2^2,$  and  $3^3$ .

**Figure S4.** Photographs of  $n = 1, 2,$  and  $3$  flakes which gradually lose their original colors and turn to transparent after 20 mins of UV illumination. The blue boxes indicate the selected regions that are enlarged in Figure 1b. The differences in brightness and contrast observed in the image of initial flakes can be attributed to optical interference caused by variations in the thickness of the exfoliated samples.<sup>4</sup>

**Figure S5.** FT-IR spectra of  $n = 1$  ( $\text{BA}_2\text{PbBr}_4$ ),  $n = 2$ , and  $n = \infty$  ( $\text{MAPbBr}_3$ ) flakes with a wavenumber range of  $1350$  to  $1700 \text{ cm}^{-1}$ .

**Figure S6.** Calibration of Fourier-transform infrared spectroscopy (FTIR) signal by quantifying the MA/BA ratio of  $n = 1, 2,$  and  $3$  flakes based on the area ratios of peaks corresponding to methyl group (circle,  $-\text{CH}_3$ ,  $1480 \text{ cm}^{-1}$ ) and amine group (cubic,  $-\text{NH}_3$ ,  $1580 \text{ cm}^{-1}$ ). The linear relationship is obtained for both groups ( $-\text{CH}_3$ :  $y = (1.03 \pm 0.02)x + (0.03 \pm 0.01)$ ,  $R^2 = 0.9997$ ;  $-\text{NH}_3$ :  $y = (0.97 \pm 0.02)x + (0.01 \pm 0.01)$ ,  $R^2 = 0.9996$ ) with the slope  $\sim 1$ . The measured peak area ratios for both methyl and amine groups are approximately the same as the nominal MA/BA ratios in all three compounds, which provides a calibration and validates that the peak area ratio can be used to measure the MA/BA ratio in degraded 2D perovskites.

**Figure S7.** Evolution of UV-Vis absorption spectra of (a)  $n = 1$ , (b)  $n = 2$ , and (c)  $n = 3$  flakes under UV illumination.

**Figure S8.** SAED patterns of (a, b)  $n = 1$  and (c, d)  $\text{MAPbBr}_3$  before and after 15 mins of UV exposure.

**Figure S9.** SEM image of degraded  $n = 2$  flakes and EDS analysis at selected points.

**Figure S10.** Evolution of XRD patterns from exfoliated  $n = 1, 2,$  and  $3$  flakes under UV illumination.

**Figure 11.** (a) PL image and (b) spectrum of fresh  $n = 2$  flakes.

**Figure 12.** (a) PL image and (b) spectrum of fresh  $n = 3$  flakes.

**Figure 13.** (a) PL image and (b) spectrum of fresh  $n = 1$  flakes. Notably, no low-energy edge peaks, typically associated with green light, are observed for the fresh sample, suggesting that the LES peaks are related to 3D perovskites.

**Figure 14.** The degradation process of a partially covered  $n = 2$  flake. Under continuous UV illumination, the intrinsic blue emission gradually diminishes, and the new green low-energy emission emerges in certain regions.

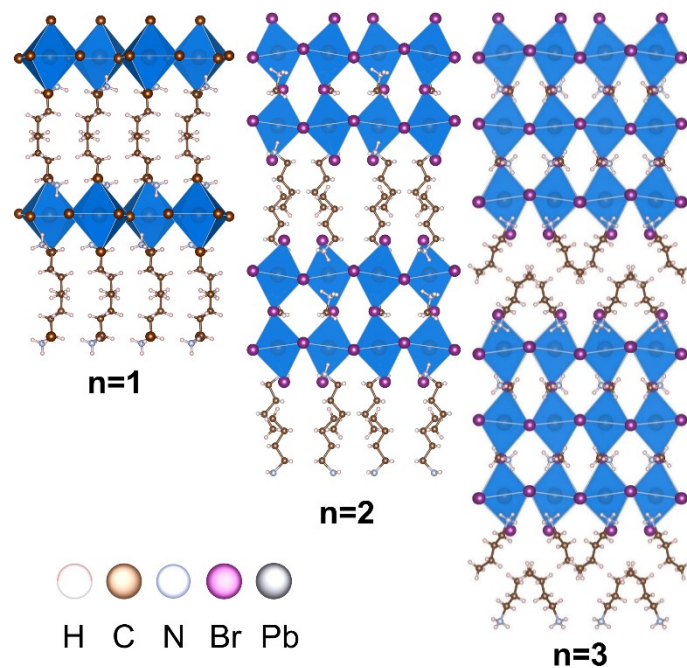

**Figure S1.** Structural model of 2D perovskite  $(\text{BA})_2(\text{MA})_{n-1}\text{Pb}_n\text{Br}_{3n+1}$  with  $n = 1, 2,$  and  $3.$

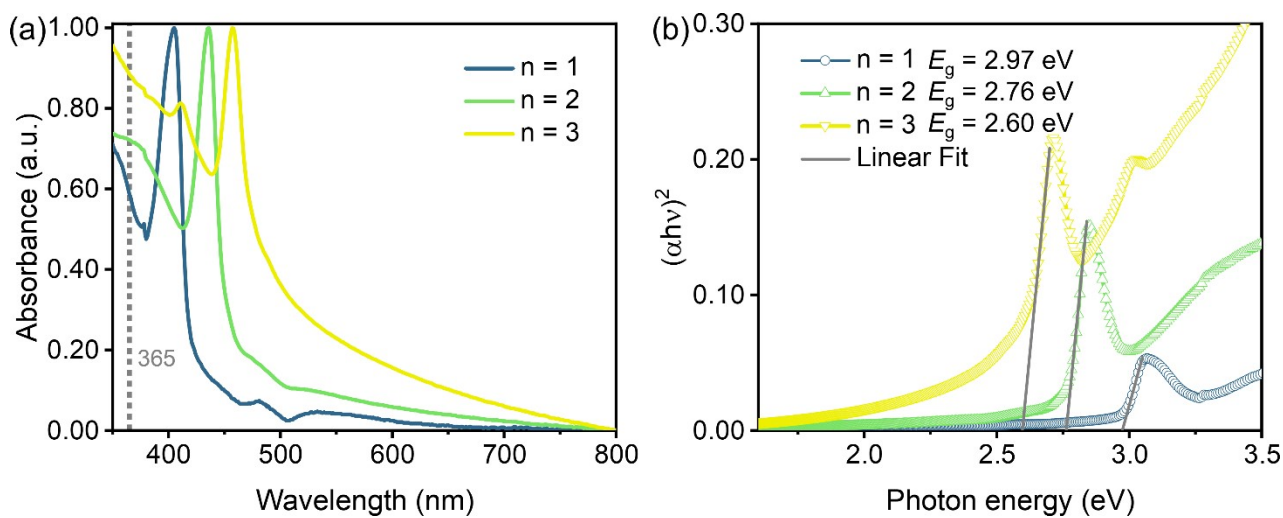

**Figure S2.** UV-vis spectra of 2D perovskite  $(\text{BA})_2(\text{MA})_{n-1}\text{Pb}_n\text{Br}_{3n+1}$  with  $n = 1, 2,$  and  $3.$

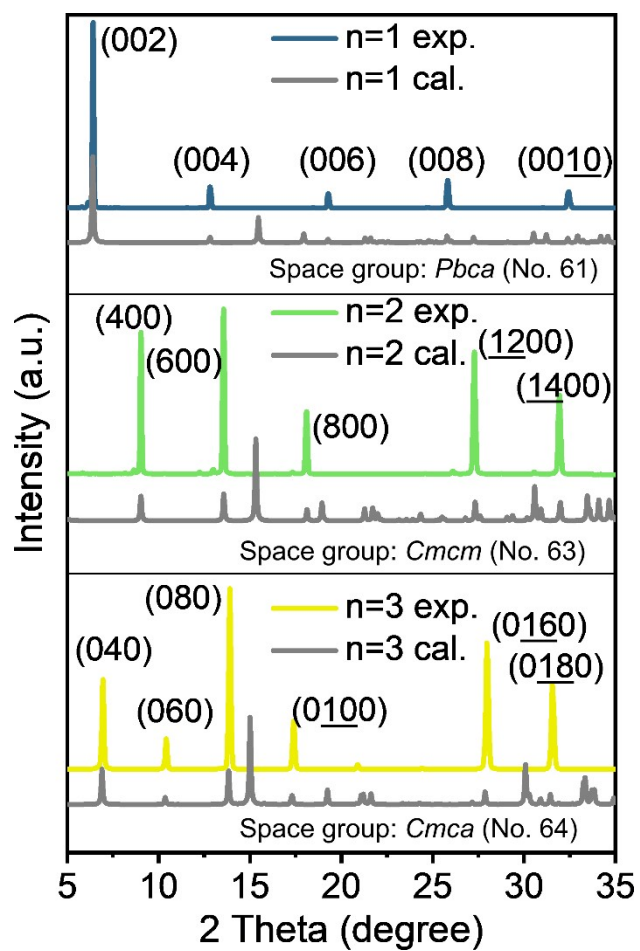

**Figure S3.** Experimental and calculated XRD patterns for 2D perovskite  $(\text{BA})_2(\text{MA})_{n-1}\text{Pb}_n\text{Br}_{3n+1}$  with  $n = 1^1, 2^2, \text{ and } 3^3$ .

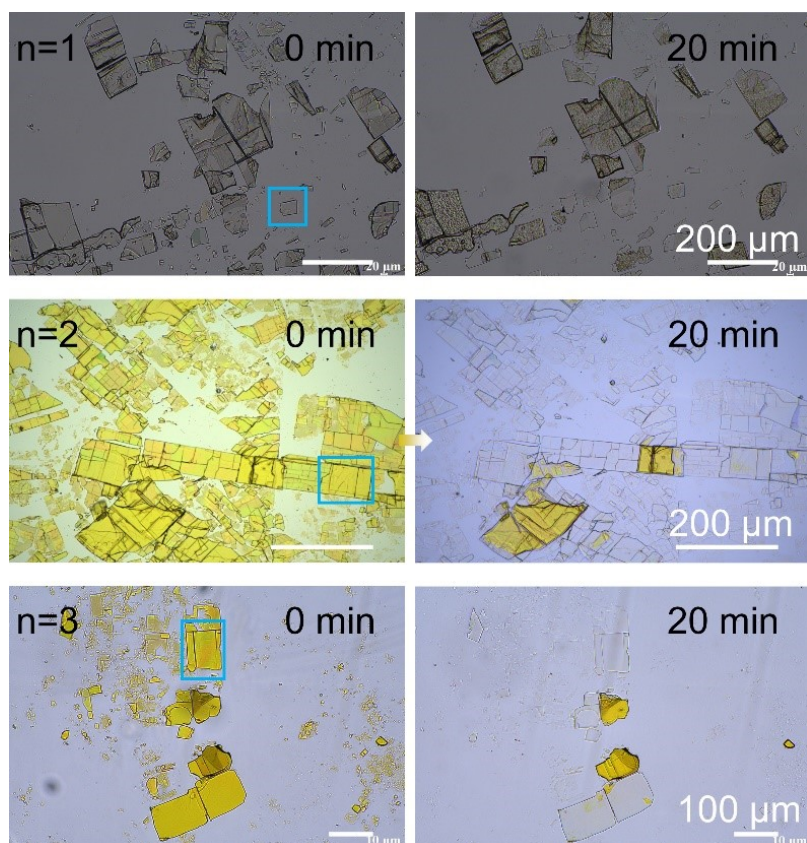

**Figure S4.** Photographs of  $n = 1, 2,$  and  $3$  flakes which gradually lose their original colors and turn to transparent after 20 mins of UV illumination. The blue boxes indicate the selected regions that are enlarged in Figure 1b. The differences in brightness and contrast observed in the image of initial flakes can be attributed to optical interference caused by variations in the thickness of the exfoliated samples.<sup>4</sup>

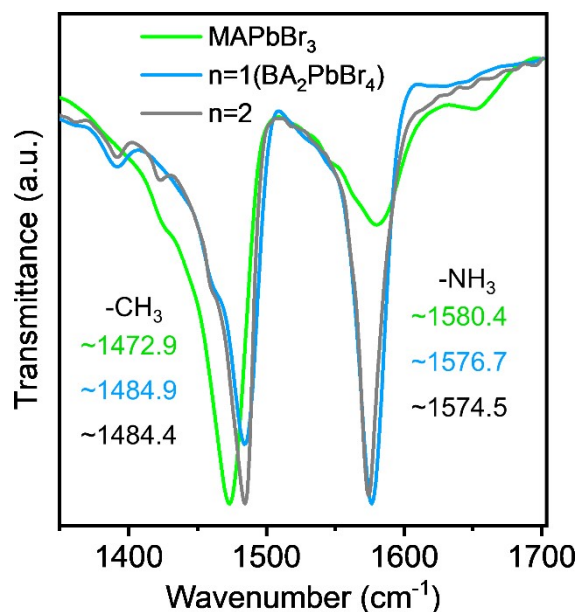

**Figure S5.** FT-IR spectra of  $n = 1$  (BA<sub>2</sub>PbBr<sub>4</sub>),  $n = 2$ , and  $n = \infty$  (MAPbBr<sub>3</sub>) flakes with a wavenumber range of 1350 to 1700 cm<sup>-1</sup>.

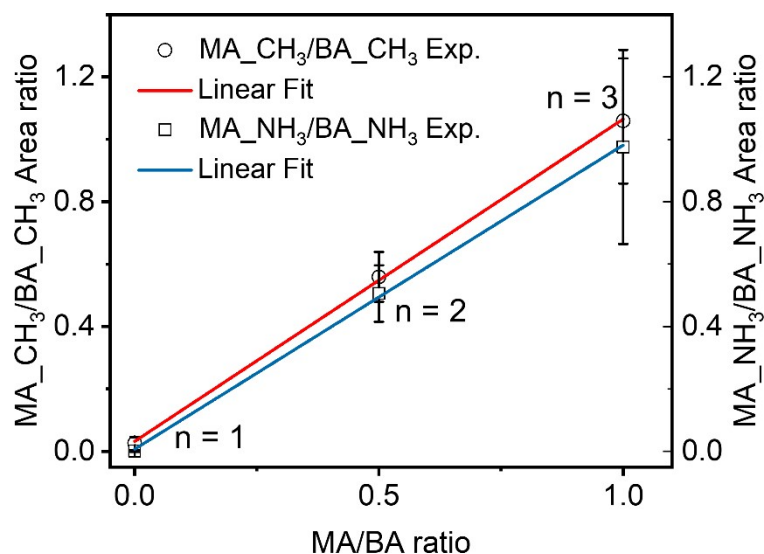

**Figure S6.** Calibration of Fourier-transform infrared spectroscopy (FTIR) signal by quantifying the MA/BA ratio of  $n = 1, 2,$  and  $3$  flakes based on the area ratios of peaks corresponding to methyl group (circle,  $-\text{CH}_3$ ,  $1480 \text{ cm}^{-1}$ ) and amine group (square,  $-\text{NH}_3$ ,  $1580 \text{ cm}^{-1}$ ). The linear relationship is obtained for both groups ( $-\text{CH}_3$ :  $y = (1.03 \pm 0.02) x + (0.03 \pm 0.01)$ ,  $R^2 = 0.9997$ ;  $-\text{NH}_3$ :  $y = (0.97 \pm 0.02) x + (0.01 \pm 0.01)$ ,  $R^2 = 0.9996$ ) with the slope  $\sim 1$ . The measured peak area ratios for both methyl and amine groups are approximately the same as the nominal MA/BA ratios in all three compounds, which provides a calibration and validates that the peak area ratio can be used to measure the MA/BA ratio in degraded 2D perovskites.

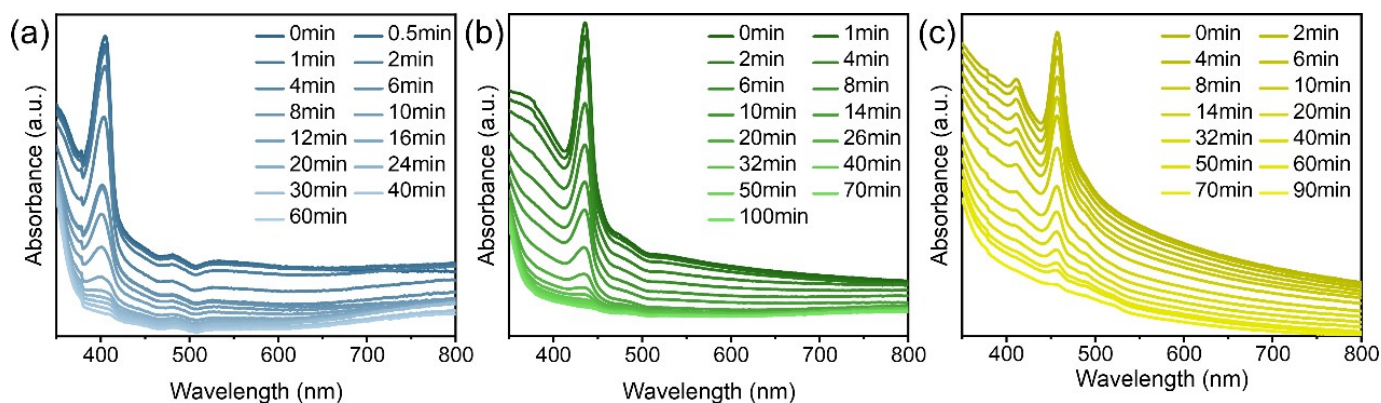

**Figure S7.** Evolution of UV-Vis absorption spectra of (a)  $n = 1,$  (b)  $n = 2,$  and (c)  $n = 3$  flakes under UV illumination.

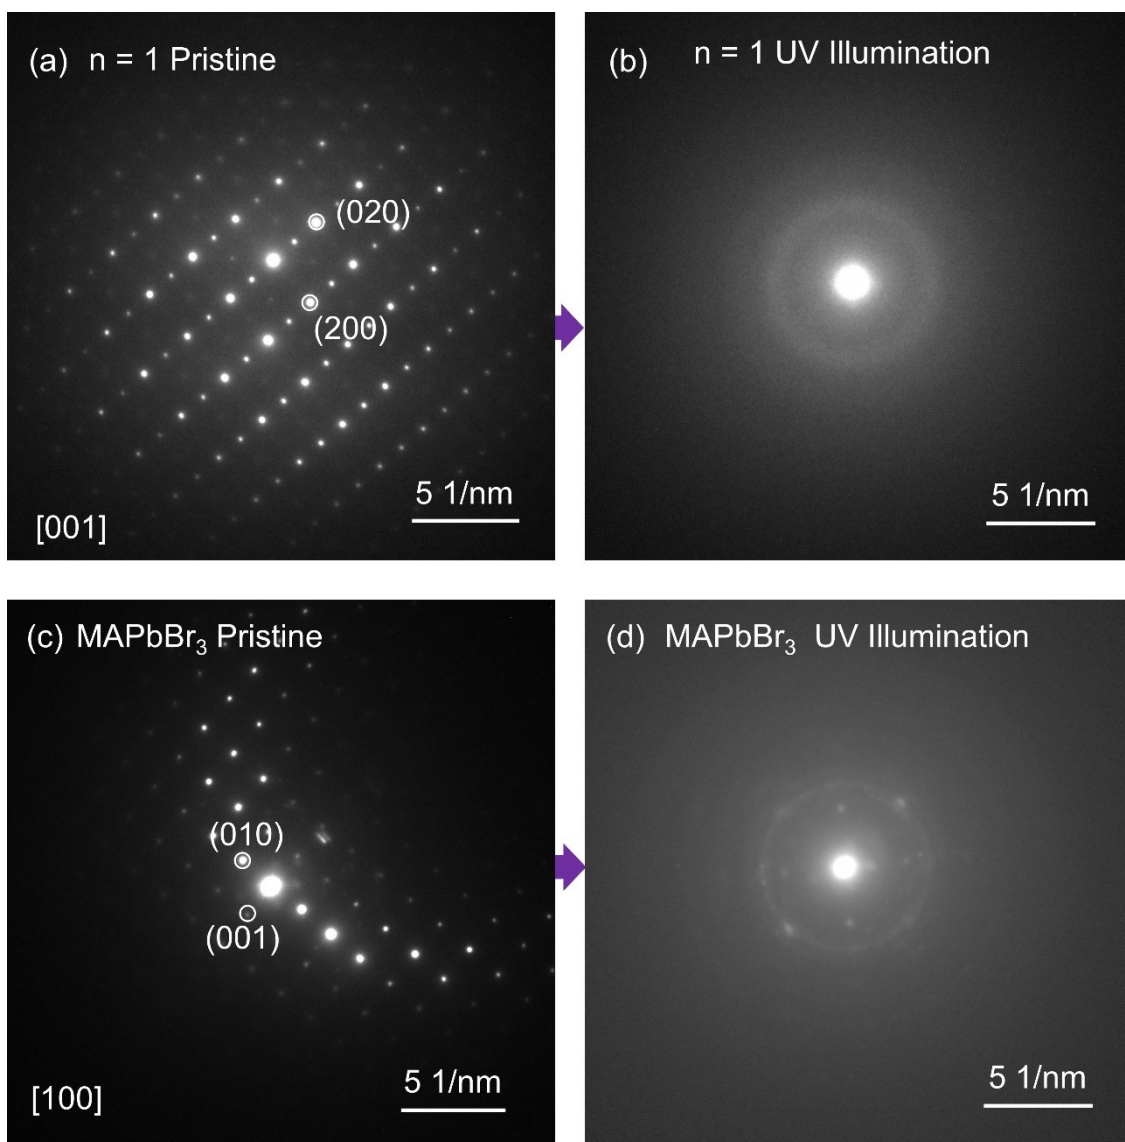

**Figure S8.** SAED patterns of (a, b)  $n = 1$  and (c, d)  $\text{MAPbBr}_3$  before and after 15 mins of UV exposure.

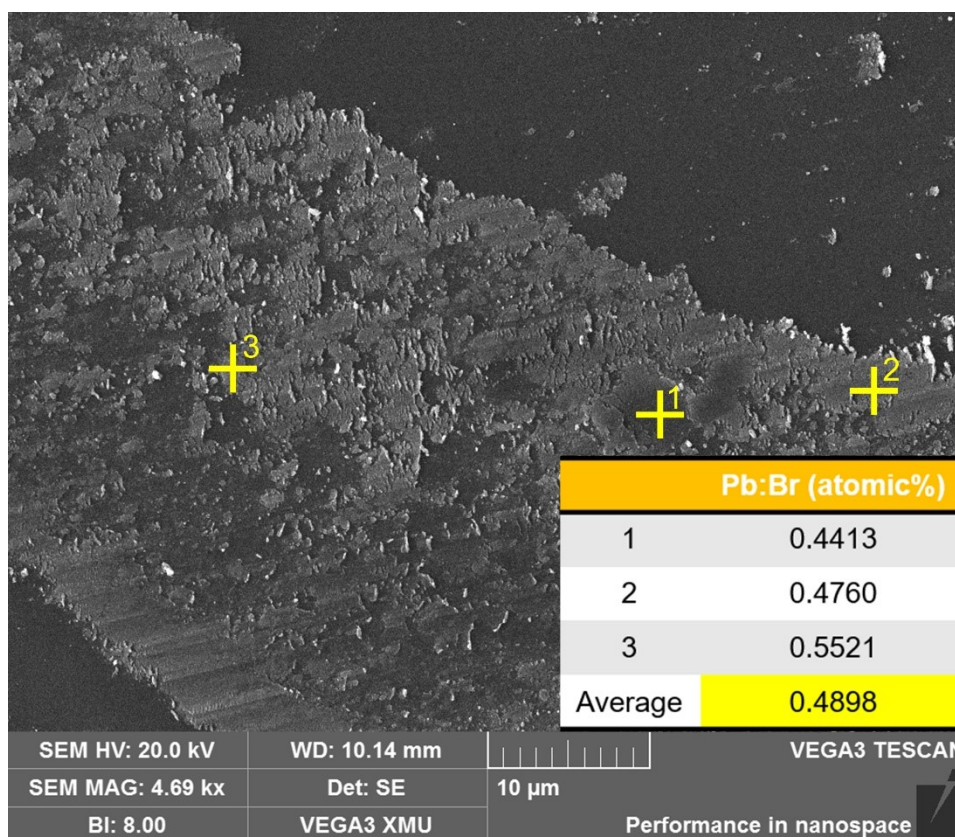

**Figure S9.** SEM image of degraded  $n = 2$  flakes and EDS analysis at selected points.

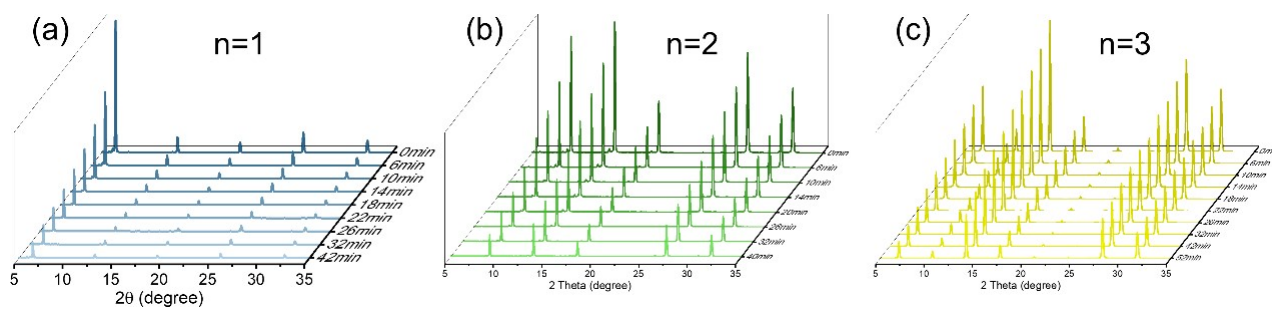

**Figure S10.** Evolution of XRD patterns from exfoliated  $n = 1, 2,$  and  $3$  flakes under UV illumination.



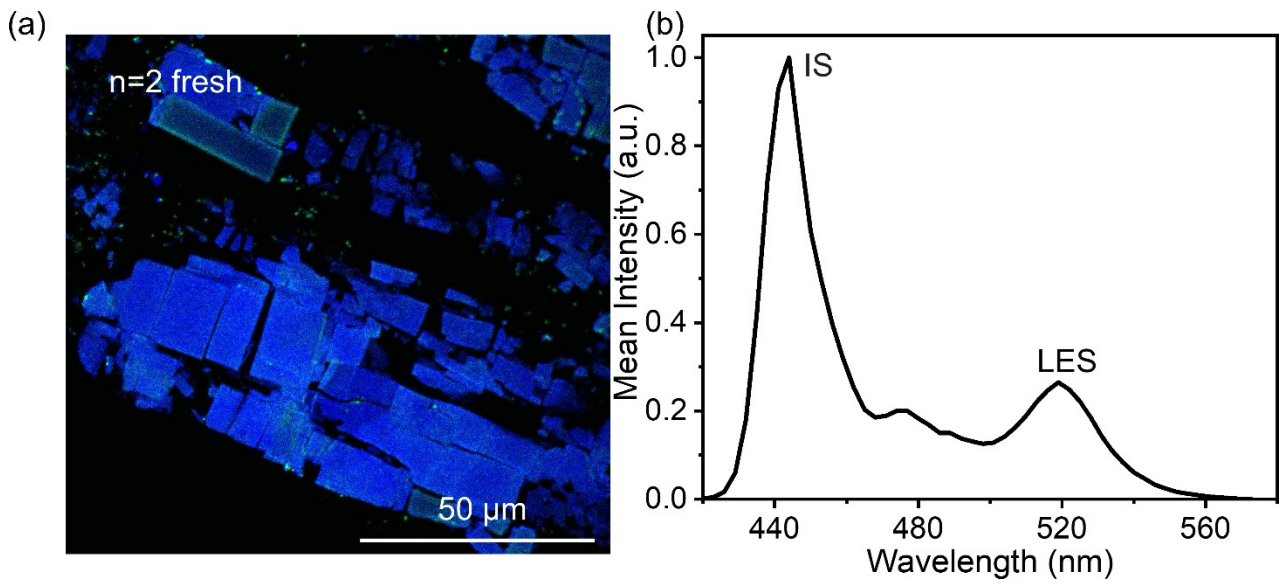

**Figure 11.** (a) PL image and (b) spectrum of fresh  $n = 2$  flakes.

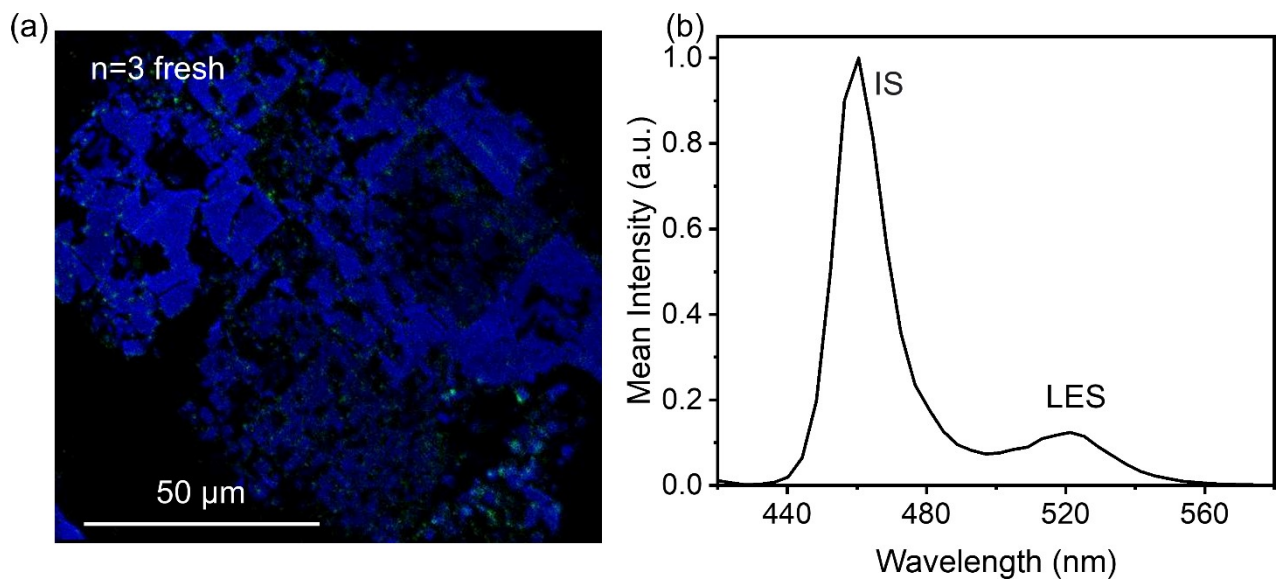

**Figure 12.** (a) PL image and (b) spectrum of fresh  $n = 3$  flakes.

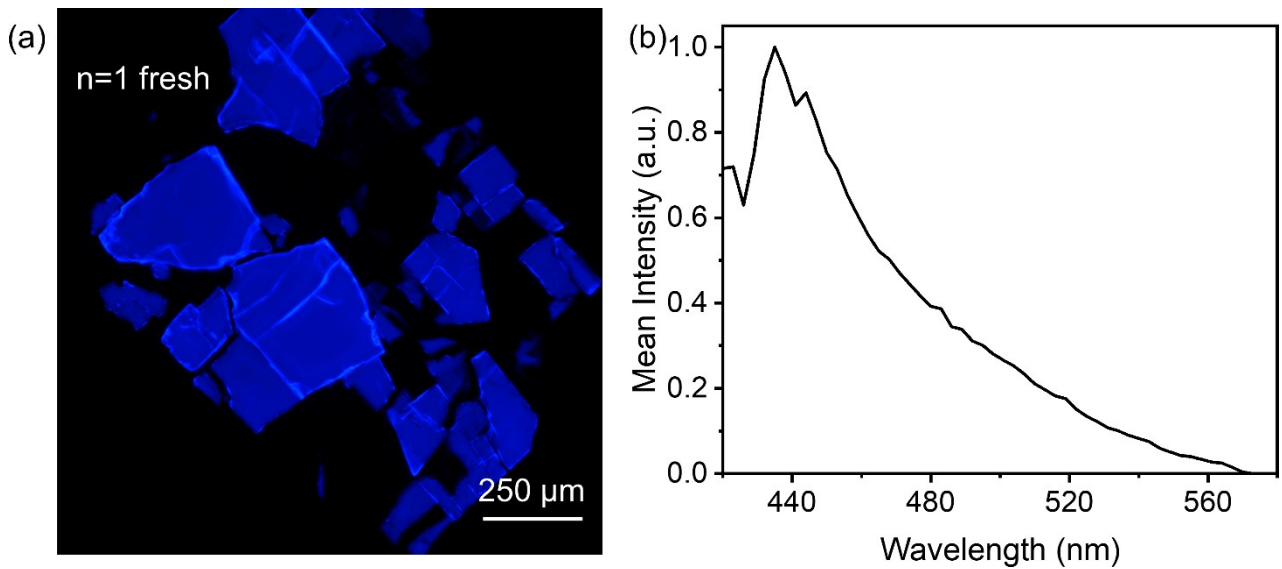

**Figure 13.** (a) PL image and (b) spectrum of fresh  $n = 1$  flakes. Notably, no low-energy edge peaks, typically associated with green light, are observed for the fresh sample, suggesting that the LES peaks are related to 3D perovskites.

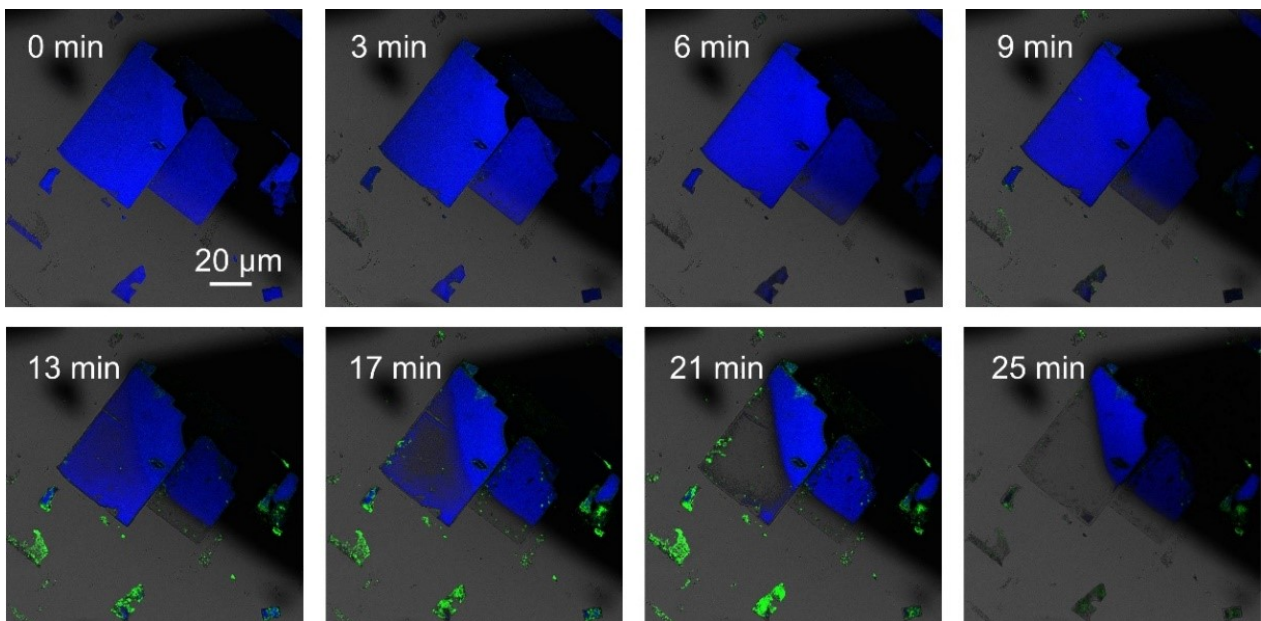

**Figure 14.** The degradation process of a partially covered  $n = 2$  flake. Under continuous UV illumination, the intrinsic blue emission gradually diminishes, and the new green low-energy emission emerges in certain regions.

## Reference

1. M. D. Smith, A. Jaffe, E. R. Dohner, A. M. Lindenberg and H. I. Karunadasa, Structural origins of broadband emission from layered Pb–Br hybrid perovskites, *Chem. Sci.*, 2017, **8**, 4497-4504.
2. L. Li, X. Liu, Y. Li, Z. Xu, Z. Wu, S. Han, K. Tao, M. Hong, J. Luo and Z. Sun, Two-Dimensional Hybrid Perovskite-Type Ferroelectric for Highly Polarization-Sensitive Shortwave Photodetection, *J. Am. Chem. Soc.*, 2019, **141**, 2623-2629.
3. L. Li, Z. Sun, P. Wang, W. Hu, S. Wang, C. Ji, M. Hong and J. Luo, Tailored Engineering of an Unusual  $(\text{C}_4\text{H}_9\text{NH}_3)_2(\text{CH}_3\text{NH}_3)_2\text{Pb}_3\text{Br}_{10}$  Two-Dimensional Multilayered Perovskite Ferroelectric for a High-Performance Photodetector, *Angew. Chem. Int. Ed.*, 2017, **56**, 12150-12154.
4. H. Li, J. Wu, X. Huang, G. Lu, J. Yang, X. Lu, Q. Xiong and H. Zhang, Rapid and Reliable Thickness Identification of Two-Dimensional Nanosheets Using Optical Microscopy, *ACS Nano*, 2013, **7**, 10344-10353.
